# Supplementary material for: A sustainable protocol for the facile synthesis of zinc-glutamate MOF: an efficient catalyst for room temperature CO2fixation reactions under wet conditions
Source: Royal Society of Chemistry journal article supplement (doi:10.1039/c5cc07781h), 2015-10-21
Supplement: c5cc07781h1.pdf [file c5cc07781h1.pdf]

## **Supporting Information**

**for**

### **A Sustainable Protocol for the Spontaneous Synthesis of Zinc-Glutamate MOF: Efficient Catalyst for Room Temperature CO<sub>2</sub> Fixation Reactions in Wet Conditions**

Amal Cherian Kathalikkattil,<sup>a</sup> Roshith Roshan,<sup>a</sup> Jose Tharun,<sup>a</sup> Robin Babu,<sup>a</sup> Gyeong-Seon Jeong,<sup>a</sup> Dong-Woo Kim<sup>b</sup>, Sung June Cho,<sup>c</sup> and Dae-Won Park<sup>a,\*</sup>

<sup>a</sup>School of Chemical and Biomolecular Engineering, Pusan National University, Busan 609-735, Korea, Fax: (+82) 51-512-8563

<sup>b</sup>Division of Ulsan Research Center for Green Fine Chemicals, Korea Research Institute of Chemical Technology (KRICT), Ulsan 681-802, Korea.

<sup>c</sup>Dept. of Chemical Engineering, Chonnam National University, Gwangju, Korea

\*Corresponding Author E-mail: [dwpark@pusan.ac.kr](mailto:dwpark@pusan.ac.kr)

## S1. Experimental

### S1.1 Reagents and Methods

L-Glutamic acid (>99 %),  $\text{ZnSO}_4 \cdot 7\text{H}_2\text{O}$  (>99 %), NaOH and ( $\pm$ )-propylene oxide (PO, >99 %) were purchased from Aldrich, Korea and used as received. Doubly distilled water was used for catalyst synthesis. Toluene for GC/internal standard (anhydrous, >99.8%) was purchased from Aldrich.  $\text{CO}_2$  of 99.999% purity was used for cycloadditions without further purification.

### S1.2 Synthesis of the Catalyst: Instant synthesis of aquazinc(II) glutamate hydrate

Rapid room temperature synthesis of zinc-glutamate-MOF was performed by the direct mixing of L-Glutamic acid (0.294g, 2 mmol), NaOH (0.200g, 5mmol) and  $\text{ZnSO}_4 \cdot 7\text{H}_2\text{O}$  (0.575g, 2 mmol) in aqueous solution. The readily precipitated white material was filtered and dried in air (Fig. S1).

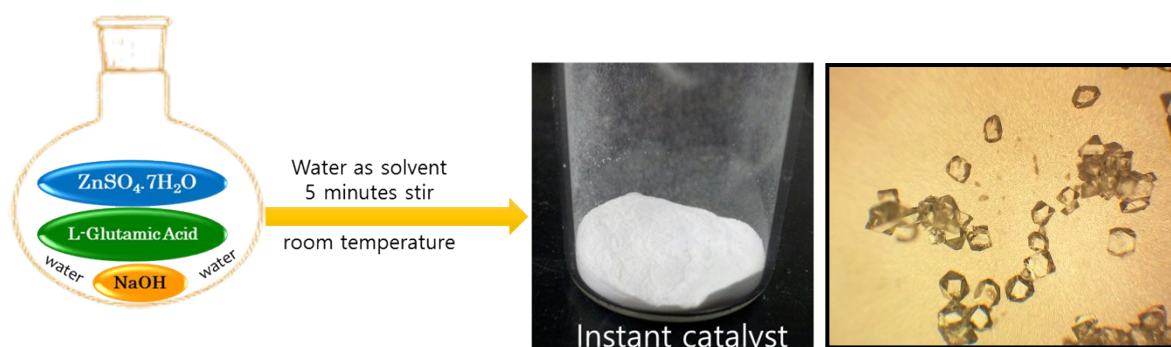

**Fig. S1:** Scheme for the synthesis of ZnGlu at room temperature, and the images of room temperature synthesized MOF compared with the single crystals (right).

### S1.3 Characterization

Powder X-ray diffraction (XRD) patterns were obtained with a Philips PANalytical X'pert PRO power diffractometer operating at 40 kV and 30 mA by using Ni-filtered  $\text{CuK}\alpha$  radiation ( $\lambda=1.5404$  Å). The diffractograms were recorded in the  $2\theta$  range of  $5\text{--}50^\circ$  (Fig. S2). FTIR spectra were obtained with an Avatar 370 Thermo Nicolet spectrophotometer at a resolution of  $4\text{ cm}^{-1}$  (Fig. S3). The material surface was observed with an S-4200 field-emission

scanning electron microscope (Hitachi). Thermogravimetric analysis (TGA) was conducted using an AutoTGA 2950 apparatus under a nitrogen flow of 100 mL min<sup>-1</sup> while heating from room temperature at a rate of 10 °C min<sup>-1</sup> (Fig. S4). CD spectra was recorded in a JASCO-J715 Spectrophotometer and the solid state spectra was recorded in KBr pellete (Fig. S5). BET measurements (Fig. S7) was recorded in a micromeritics ASAP 2020 instrument after activating the sample at 120 °C for 6 h.

#### **S1.4 Cycloaddition of CO<sub>2</sub> with PO or 2-MeAz**

Synthesis of propylene carbonate from PO (or 2-MeAz) and CO<sub>2</sub> (Scheme 1) was performed in a 25 mL stainless-steel autoclave equipped with a magnetic stirrer. For each typical operation, PO (42.9 mmol) or 2-MeAz (28.3 mmol) and zinc-glutamate catalyst (and cocatalyst, wherever applicable) were introduced to the reactor without solvent. The reactor was then pressurized with CO<sub>2</sub> to the preset pressure at room temperature and stirring was set at 600 rpm. When the desired time was elapsed, cycloaddition was stopped and the reaction was cooled externally to 0 °C using ice bath. Toluene was added as internal standard cum solvent for PO, while THF was added as GC solvent (and biphenyl as internal standard) in the case of 2-MeAz. The mixture was centrifuged to separate the catalyst, and the products were identified with a gas chromatograph (GC, Agilent HP 6890 A) equipped with a capillary column (HP-5, 30 m x 0.25 mm) using a flame ionization detector.

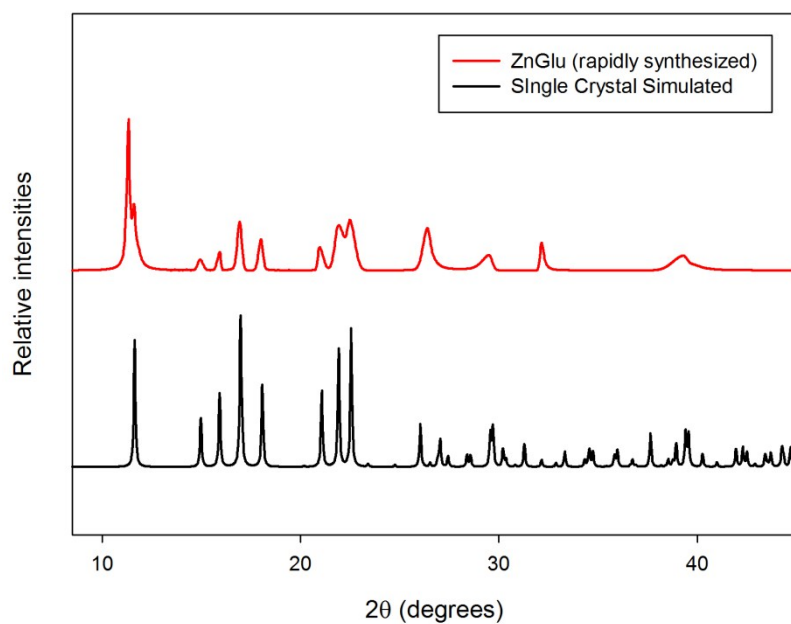

**Fig. S2:** XRD Spectra of rapidly synthesized ZnGlu in comparison with single crystal simulated pattern.

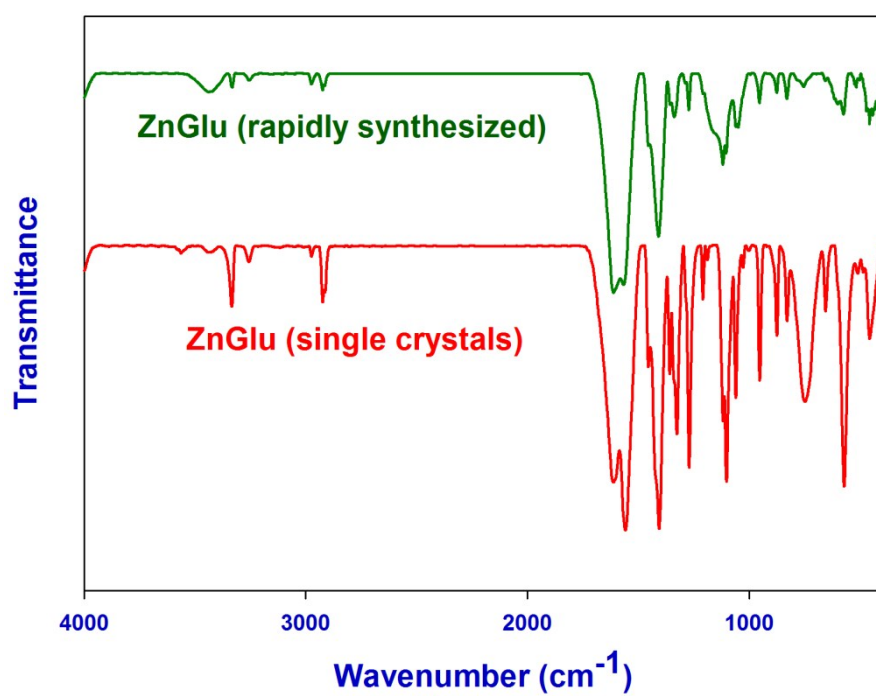

**Fig. S3:** FTIR Spectra of rapidly synthesized ZnGlu in comparison with single crystal.

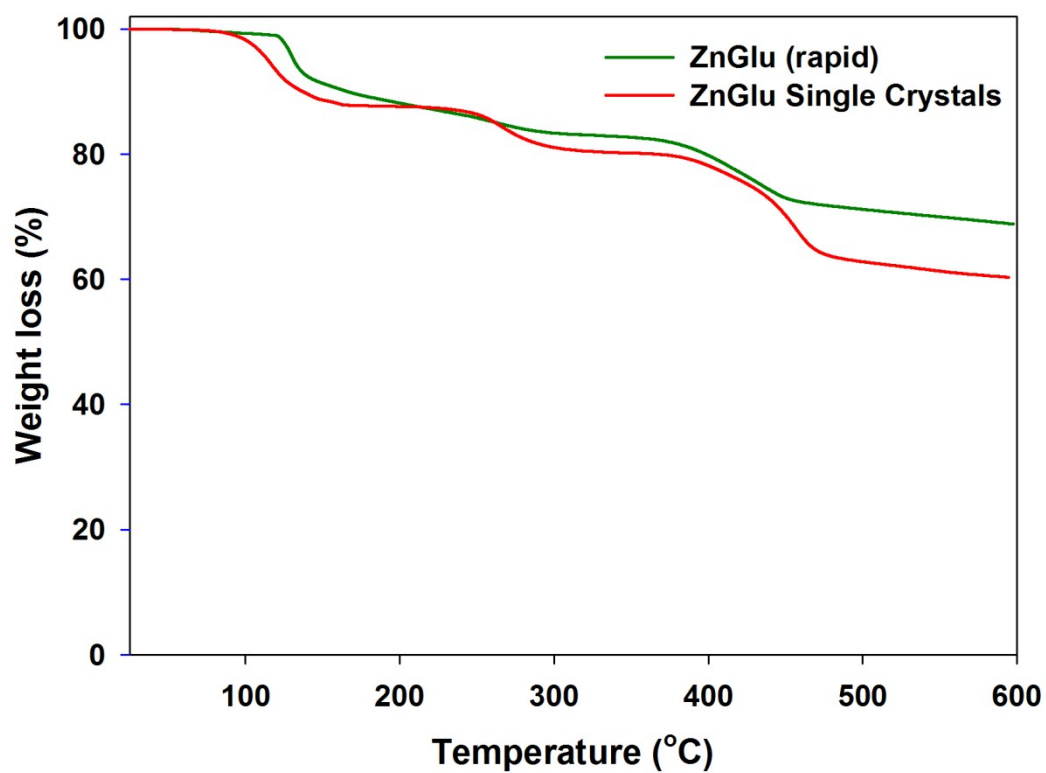

**Fig. S4:** TGA curves of rapidly synthesized ZnGlu and single crystals of ZnGlu.

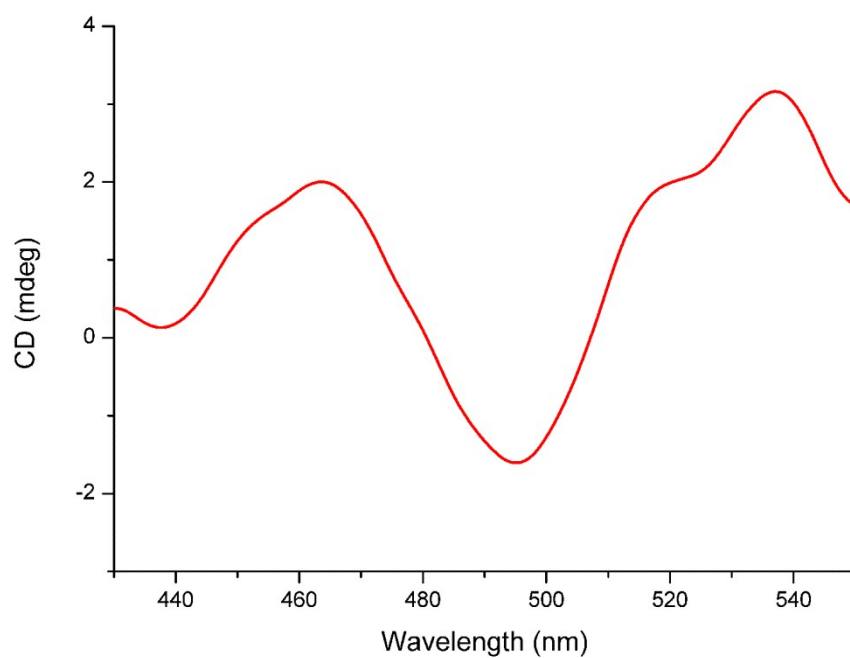

**Fig. S5:** Solid state CD spectra of ZnGlu

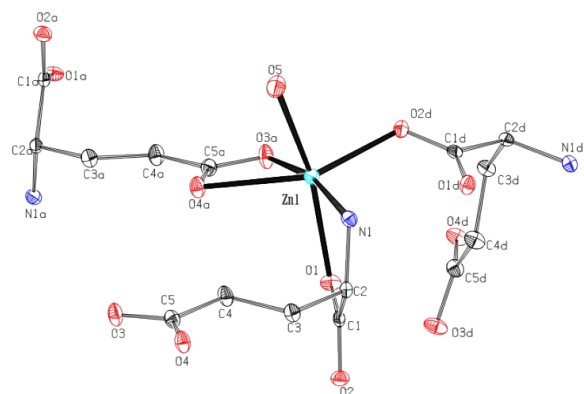

**Fig. S6:** ORTEP diagram showing the octahedral coordination environment around Zinc.

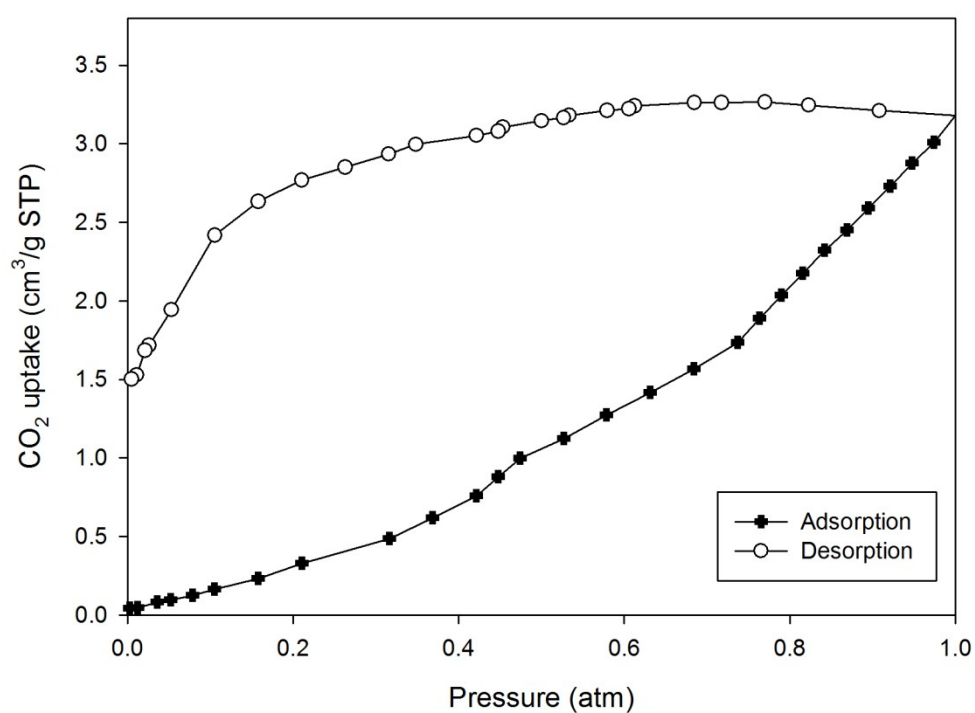

**Fig. S7:** CO<sub>2</sub> uptake by ZnGlu (a) adsorption curve (b) desorption curve.

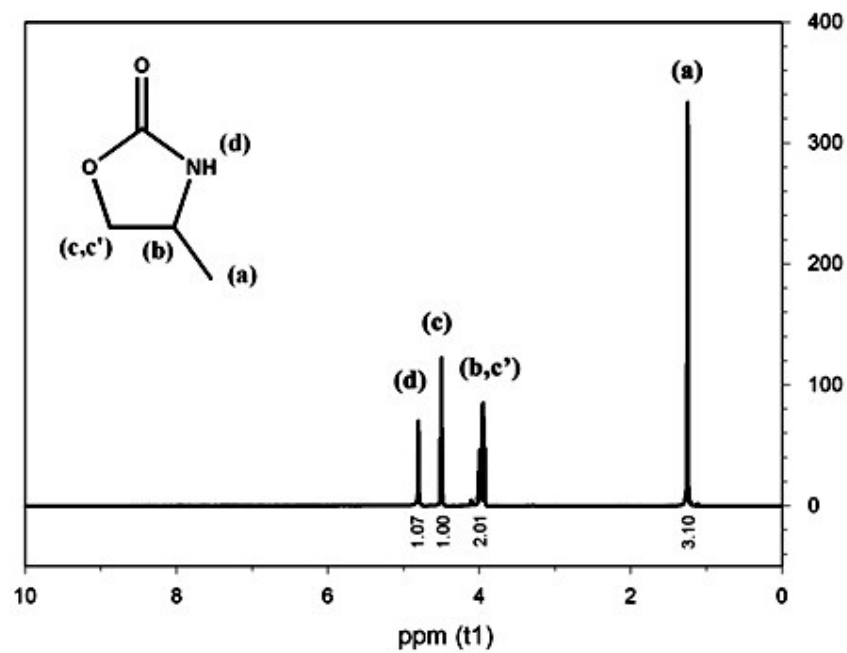

**Fig. S8:**  $^1\text{H}$ -NMR of the isolated 4-methyl-2-oxazolidinone

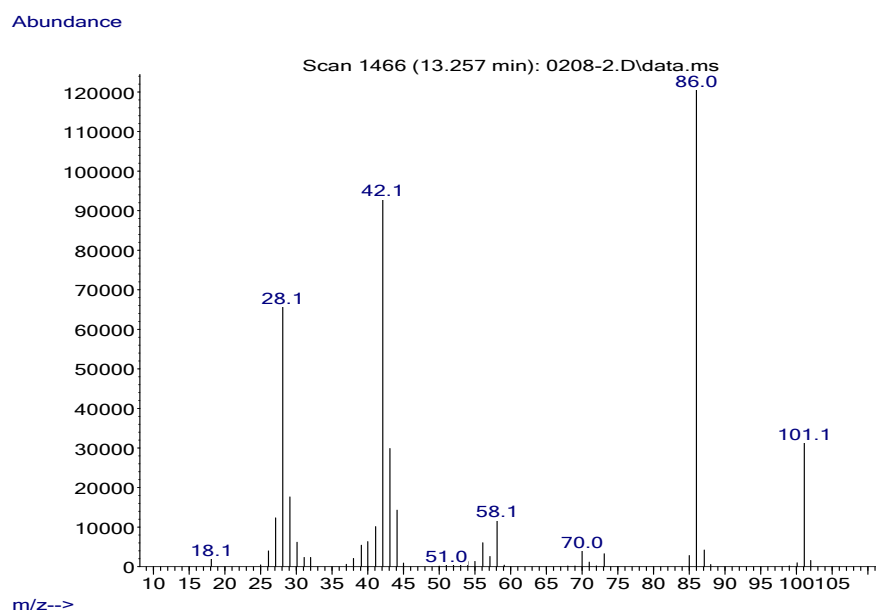

**Fig. S9:** GC-MS fragmentation pattern of 4-methyl-2-oxazolidinone, RT=13.25 min

### S1.5 Catalyst Recycling

After the CO<sub>2</sub> cycloaddition reaction at optimum conditions, it was mixed with (GC/internal standard) and centrifugation was performed to recover the catalyst. The supernatant was taken for further GC analysis and for ICP-OES to verify if any leaching occurred during the reaction. The recovered catalyst was washed several times with water and dried in air for a day, and used for further run.

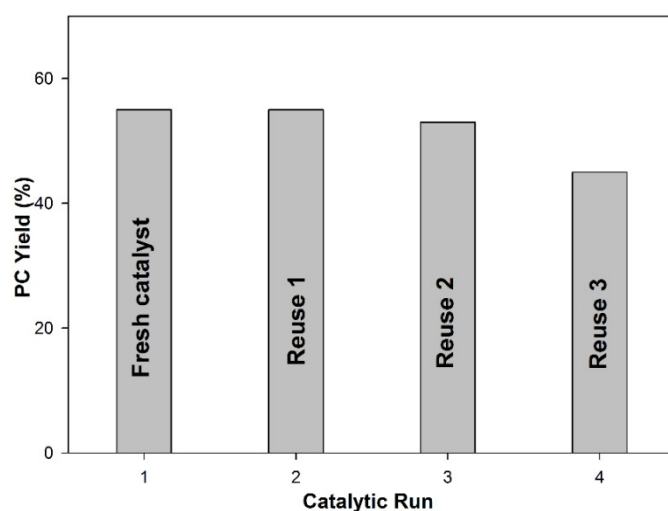

**Fig. S10:** Recycling test for zinc-glutamate-MOF (conditions same as Table 1, entry 5).

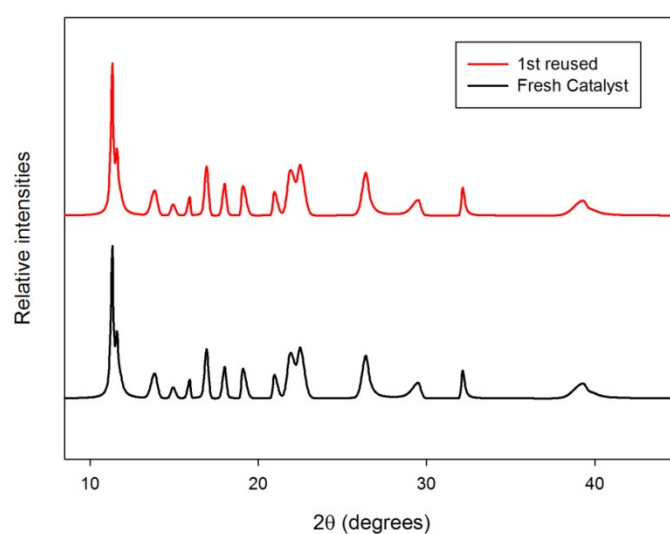

**Fig. S11:** XRD analysis of the recycled catalyst (first reuse) compared to the fresh one.



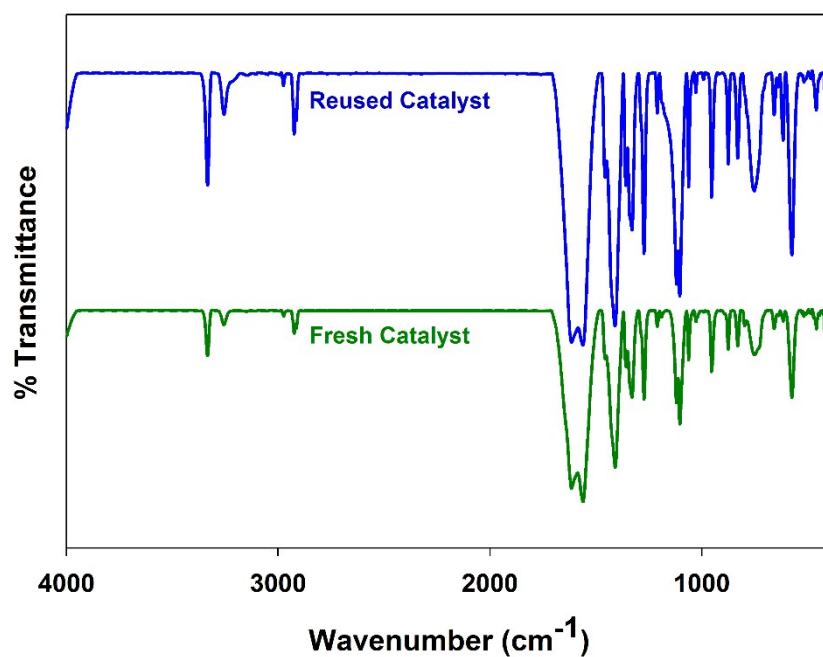

**Fig. S12:** FT-IR spectrum of the fresh catalyst compared to first reused catalyst.

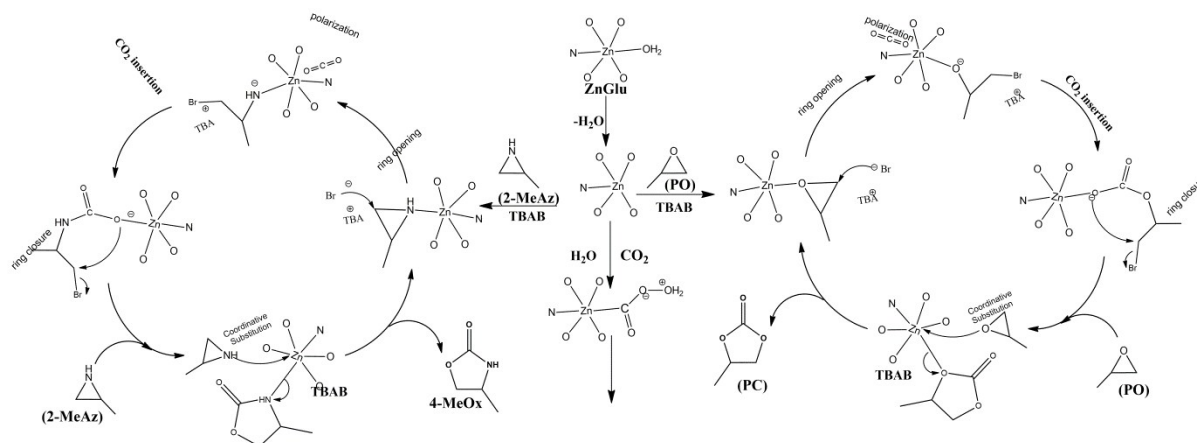

**Fig. S13:** Mechanism for the cycloaddition of CO<sub>2</sub> with PO and 2-MeAz to form PC and 4-MeOx, using ZnGlu/TBAB.
